# Supplementary material for: Snow-induced buffering in aerosol–cloud interactions
Source: Copernicus journal article supplement (doi:10.5194/acp-2020-232), 2020-03-31
Supplement: Supplementary file [file acp-2020-232-AC1-supplement.pdf]

# Response to Reviewer #1 of acp-2020-232

Dear Reviewer #1,

Thank you very much for taking your time to review our paper. We think that your comments greatly help improve the manuscript. We have revised the manuscript according to your comments as explained below with point-by-point responses to your comments. We hope that the revision is enough to address your comments to make the manuscript now acceptable for publication in *ACP*.

**[RC]: Referee comment**

**[AC]: Author comment**

## Reviewer #1:

### General comments:

**[RC]** *This manuscript demonstrates the impact of falling hydrometeors on the effective radiative forcing of aerosol-cloud interactions in MIROC6 by modifying their microphysics from diagnostic precipitation to prognostic precipitation. The authors find that the large deviation in  $ERF(aci)$  in the old scheme is significantly improved as the magnitude of  $ERF(aci)$  is reduced. A series of sensitivity tests reveal that prognostic snow has substantial impact on both shortwave and longwave forcing induced by aerosols. This is an excellent modeling work, particularly that the impacts of many physical processes relating to aerosol-cloud interactions are quantified, as illustrated in Figure 4. However, there are some issues need to be clarified before accepted for publication.*

**[AC]** We would like to thank referee #1 for his/her positive comments and suggestions. We agree with the referee's comment that the manuscript needs more discussion about the physical mechanisms behind the snow-induced buffering ACI. We have added a more detailed description of the structural difference between DIAG and PROG, the roles of aerosol scavenging processes, and limitation of the present study, as shown in [\[AC1\]](#), [\[AC2\]](#), [\[AC3\]](#), [\[AC4\]](#), [\[AC5\]](#), and [\[AC16\]](#) below.

In the revised manuscript, we have improved the method for estimating  $ERF_{aci}$  in MIROC through providing "clean-sky  $ERF_{aci}$ " based on Ghan (2013) to preclude contamination by aerosol-radiation interaction in cloudy-sky condition, according to the other referee's comment (Figures R2–R4; [\[AC6\]](#)). Furthermore, we have added a new estimate of multi-satellite  $ERF_{aci}$  which considers the retrieval error based on Ma et al. (2018), as shown in Figure R3.

The reply and corrections on individual comments are shown below.

### Major concerns:

**[RC1]**  *$ERF(aci)$  is determined not only by changes in optical properties of cloud and precipitating particles, but also by changes in the cloud cover, particularly in GCM. In the text, the authors only show that the simulated cloud cover is "in good agreement" with the observation (although I think underestimation of high clouds is quite severe). However, the aerosol-induced change in cloud cover is not discussed at all.*

**[AC1]** Thank you for your important comment. This study does not discuss the contribution of changes in cloud cover to  $ERF_{aci}$ , but it can also contribute to  $ERF_{aci}$  although the magnitude might be relatively minor compared to the CLWP adjustment (e.g., Mülmenstädt et al., 2019; Gryspeerdt et al., 2020). The  $ERF_{aci}$  correlates the PD minus PI change in CLWP robustly than that in cloud cover (Gettelman, 2015) as shown in Figure R1 because aerosol effects are directly linked to CLWP rather than cloud fraction by modifying the mass conversion rate from cloud water to rainwater that itself relates to the treatment of precipitation (i.e., DIAG vs PROG). However, there might be a feedback from precipitation treatment onto cloud fraction and thus it is nevertheless important in future studies to quantify the impact of precipitation modeling on relative contributions of the CLWP adjustment and cloud fraction adjustment through decomposing the forcing into the two components (Mülmenstädt et al., 2019). We have added brief arguments of this issue as follows (Section 5, Line 239): "This study primarily focused on  $ERF_{aci}$  sensitivities to the CLWP adjustment rather than cloud fraction

adjustment, because aerosol effects are directly linked to the CLWP change through the modification of the mass conversion rate from cloud water to rainwater that itself relates to the treatment of precipitation (i.e., DIAG vs PROG). However, it is important in future studies to separating the ACI into the Twomey forcing and rapid adjustments of CLWP and cloud fraction (e.g., Goren and Rosenfeld, 2014; Mülmenstädt et al., 2019) for better understanding how the treatment of precipitation influences micro- and macroscopic cloud properties (Michibata and Suzuki, 2020), which relates to the fundamental inter-model spread in ERF<sub>aci</sub> (Gryspeerd et al. 2020; Bellouin et al., 2020).” We have also modified the description of the modeled cloud cover (Section 2.2) according to the comment.

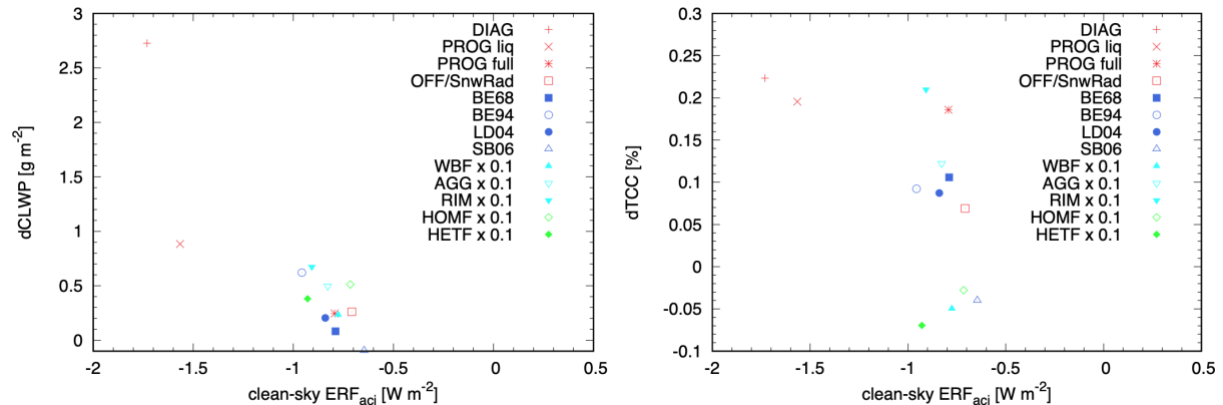

**Figure R1.** The relation between clean-sky ERF<sub>aci</sub> and **(left)** change in CLWP and **(right)** change in total cloud cover (TCC) from preindustrial to present-day conditions. Plots in red are tests of different precipitation framework, plots in blue are liquid autoconversion tests, plots in cyan are ice microphysics tests, and plots in green are tests for freezing processes.

**[RC2]** *From this manuscript, it is not clear to me how the aerosol scavenging process works in MIROC6 DIAG or PROG version. I suppose that PROG can simulate aerosol washout more realistic with falling rain and snow, and both ERF(aci) and ERF(ari) could be influenced.*

**[AC2]** According to our parallel analysis that was focused on sensitivities of ERF<sub>aci</sub> to the scavenging process, both wet-scavenging and coalescence scavenging are found to contribute to decreasing the magnitude of ERF<sub>aci</sub>. The enhancement of accretion and thus precipitation in the PROG simulation results in a more efficient scavenging process, which weakens the magnitude of the ACI (accretion-driven buffering mechanisms) as detailed in our recent publication (Michibata and Suzuki, 2020). We have added this argument as follows (Line 199): “Although the ERF<sub>aci</sub> variations with changing liquid and ice microphysical processes do not reach the difference of ERF<sub>aci</sub> between the DIAG and PROG (i.e., 54%), both wet-scavenging of aerosols and coalescence scavenging of cloud droplets also contribute to the ACI reduction (McCoy et al., 2020) due to the accretion-driven buffering mechanisms (Michibata and Suzuki, 2020), which should explain the remaining part of the ERF<sub>aci</sub> difference.”

**[RC3]** *This manuscript primarily focuses on the SW, while there is very little discussion about LW. The change in ERF(aci)-LW only attributes to “adjustment induced by snow together with its radiative effect” (Line 139). It is way too brief. The authors should elaborate the physical processes related to the “adjustment”.*

**[AC3]** The following discussion has been added (Line 141): “The LW ERF<sub>aci</sub> is significant over the Indian Ocean and Southeast Asia (not shown), which is also similar to the other model, CAM5-MARC-ARG (Grandey et al., 2018). This is attributable to the increased ice nuclei (IN) due to biomass burning for example, partly supporting the convective invigoration (Rosenfeld et al., 2014) although GCMs do not have enough capability to resolve the convective cloud systems. The increased IN results in a faster glaciation and thus enhances snowfall due to the WBF process (i.e., glaciation

indirect effect). These mixed- and ice-phase microphysical processes are more elaborated in the PROG scheme, and the associated LW change induced by snow is incorporated only in the PROG, which contributes to the higher LW ERF<sub>aci</sub> across the globe.”.

**[RC4]** *The authors claim that significant reduction in ERF(aci) well corresponds to snow water path (SWP) geographically (Fig. S3). It seems not true for me, particularly over the Southern Ocean. In contrast, the correlation between CLWP (Fig. S4) and ERF(aci) (Fig. 1) looks very high. It may imply that the change in ERF(aci) is primarily determined by CLWP change, and its relation with SWP is not so important.*

**[AC4]** The ERF<sub>aci</sub> primarily correlates with the change in CLWP through PI to PD as pointed by the reviewer. Since anthropogenic aerosols are very limited over the remote ocean, particularly over the Southern Ocean, the ERF<sub>aci</sub> is somewhat noisy and insignificant. What the authors are describing here is that the geographical difference of ERF<sub>aci</sub> between the DIAG and PROG is similar to the SWP distribution over East Asia, Europe, and North America where anthropogenic pollution dominates. The CLWP should increase with aerosols for both DIAG and PROG due to the cloud lifetime effect, but the significant part of increased cloud water contributes to the source of rain and snow (Fig. 3) when the model prognoses precipitating hydrometeors, and the latter plays a key role of the buffering of ACI (Fig. 4) over these anthropogenic regions.

**[RC5]** *The sequence of inference in Section 4 is complicated and not straightforward to me. The authors first state that SWP susceptibility is correlated to LWP susceptibility (which I think a little weak) and propose a hypothesis that riming is important to reduce the optical depth of clouds. However, the sensitivity test clearly reveal the importance of riming (Fig. 4). That is, the sensitivity experiment should be considered as the basis of speculation, not the supporting evidence to the hypothesis.*

**[AC5]** The hypothesis that the snow-induced buffering of ACI is mainly due to the riming process is one of the interpretations based on sensitivity tests and previous studies (e.g., Lohmann, 2017) as pointed by the reviewer. Since the mixed-phase clouds are influenced by the larger number of microphysical processes than warm-phase clouds, constraining the physical mechanisms of the buffering may be still difficult due to the limitation of isolating feedbacks from multiple microphysical processes. This needs a theoretical approach and idealized process modeling (Glassmeier and Lohmann, 2016; Glassmeier et al., 2019) in addition to a GCM study, which are our important future work beyond the present study. In the revised manuscript, we have added these arguments about the relevant works to solidify the process-level understanding of snow-induced buffering hypothesis. Section 5 (Line 238): “Furthermore, a theoretical approach (Glassmeier and Lohmann, 2016) and idealized process modeling (Glassmeier et al., 2019) are also required urgently to solidify the process-level understanding of snow-induced buffering hypothesis, which are our important future work beyond the present study.”

#### **Minor points:**

**[RC6]** *It seems to me that Figure 4 only consider the changes in ERF(aci)-SW because snow radiation is to increase ERF here. If it is the case, the figure caption and the description in the X-axis need to be more clear.*

**[AC6]** Figure 4 considers the net changes in ERF<sub>aci</sub>, but the sign of the “snow radiation” in the initial submission was wrong. This should be positive (+12.1%) because the inclusion of snow radiative effect enhances the magnitude of the ACI from -0.71 W m<sup>-2</sup> (PROG OFF/SnwRad) to -0.79 W m<sup>-2</sup> (PROG ON/SnwRad). The homogeneous freezing was also incorrect in sign, but the other items were all appropriate.

In the revised manuscript, the values of ERF<sub>aci</sub> are updated by considering the “clean-sky” condition based on Ghan (2013) as suggested by the other reviewer #2. Please be aware that Figures 1, 2, and 4 have been changed in this regard (see Figures R2–R4 below), but the conclusion of this paper does not change.

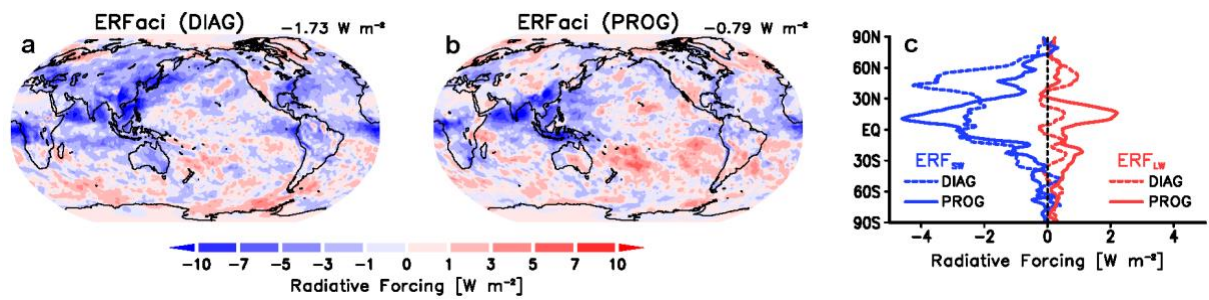

**Figure R2** (original Figure 1). Geographical distribution of the annual mean **clean-sky** ERFaci for the (a) DIAG and (b) PROG precipitation schemes. ERFaci is decomposed into (red) longwave and (blue) shortwave components in the (c) zonal mean field for the (dashed) DIAG and (solid) PROG schemes.

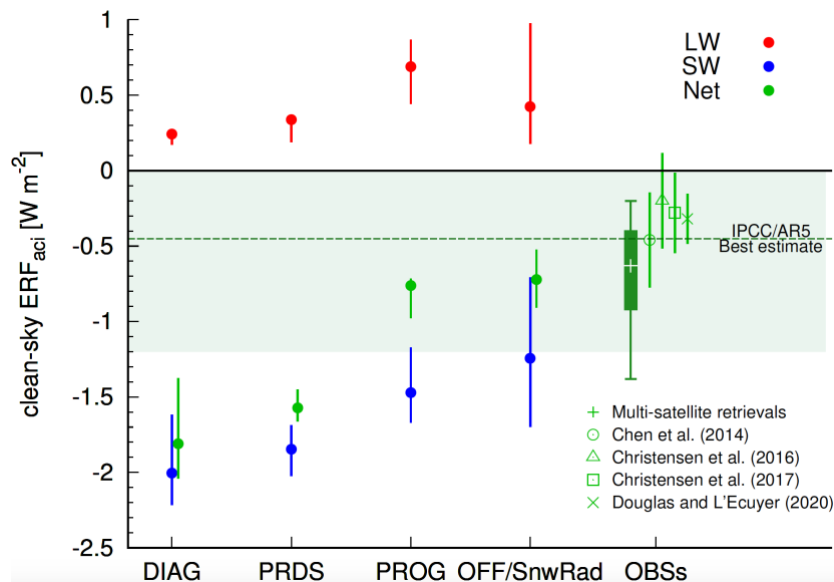

**Figure R3** (original Figure 2). ERFaci (Net ERFaci in green; LW ERFaci in red; SW ERFaci in blue) simulated from MIROC6 with different precipitation frameworks. The Net ERFaci values from observation-based studies (Chen et al., 2014; Christensen et al., 2016, 2017; Douglas and L'Ecuyer, 2020) and their probable range (box-whisker) calculated by correcting the effect of retrieval limitations (Michibata and Suzuki, 2020) based on Ma et al. (2018) are also shown. Error bars and plots in MIROC6 represent the minimum/maximum and median of the interannual variability, respectively. Shaded in light-green is the uncertainty range of ERFaci estimated from IPCC AR5 (Boucher et al., 2013). The prognostic rain with diagnostic snow scheme is denoted as “PRDS”. The sensitivity experiment without snow radiative effects is denoted as “OFF/SnwRad”.

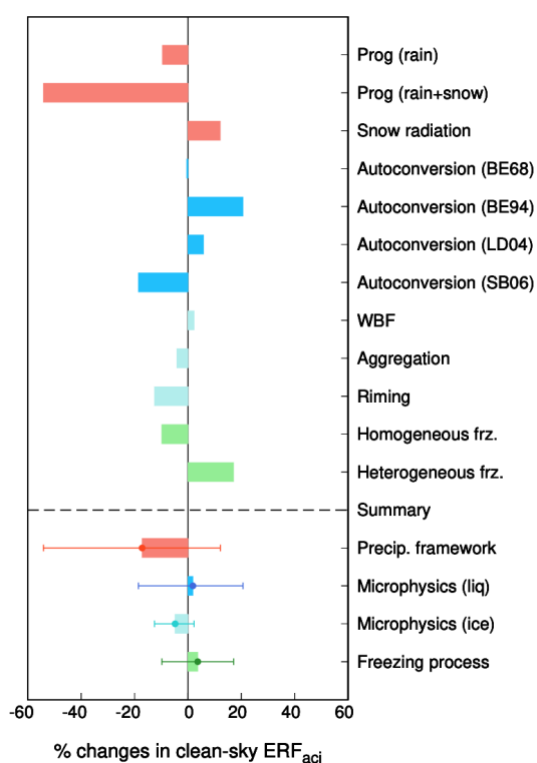

**Figure R4** (original Figure 4). Percentage change of global annual mean **clean-sky**  $ERF_{aci}$  in response to (red) the precipitation treatment, (blue) liquid microphysics, (cyan) ice microphysics, and (green) nucleation of new ice particles due to freezing. Error bars represent the minimum and maximum range for each component considered in this study.

**[RC7]** Line 87: *What is the standard time step in MIROC6 as the sub-time step is 60 s?*

**[AC7]** The standard model timestep is 12 min in MIROC6 used in this study. We have added the information in the revised manuscript (Line 97).

**[RC8]** Line 95: *Does it mean PD and PI simulations use the same SST and sea ice?*

**[AC8]** Yes, PI simulations refer only to the aerosol emissions, and greenhouse gases and SSTs remain at the PD conditions. The differences represent only the aerosol emissions, and is the standard way for diagnosing aerosol ERFs.

**[RC9]** Line 108: *WBF should be spelled out.*

**[AC9]** We have defined the term here with relevant references (Wegener, 1911; Bergeron, 1935; Findeisen, 1938) in the revised manuscript.

**[RC10]** Line 110: *“... were returned...” Does it mean the simulations without TOA balance are not used in analysis?*

**[AC10]** Yes, all the experiments used in this study are satisfied with the imbalance of TOA radiation within  $1.0 \text{ W m}^{-2}$ . Model tuning was conducted by modifying scale factor for accretion rate but not autoconversion for warm rain process, because the latter can influence the magnitude of ACI due to the direct relation to droplet number (Michibata and Takemura, 2015; Jing et al., 2019) and thus the precipitation initiation (Mülmenstädt et al., 2020). This is effective for modifying SW radiation, but if needed, cloud ice and snow processes were also tuned for modifying LW radiation by changing scale factors for the fall speed of hydrometeors, which may be unimportant on  $ERF_{aci}$  because they are not involved in the hydrometeor number densities. These tuning strategies have been added in the revised manuscript according to the comments also by the other reviewer.

**[RC11]** Line 123: This argument regarding  $ERF(ari)$  and  $ERF(aci)$  is quite indirect. Why not just show the values of these two terms?

**[AC11]** Since the ARI and ACI are related to each other, it is difficult to separate into  $ERF_{ari}$  and  $ERF_{aci}$ . We have modified the value of  $ERF_{aci}$  throughout the manuscript by replacing clean-sky  $ERF_{aci}$  as shown in **[AC6]**.

**[RC12]** Line 126: “i.e., close to zero” Its meaning is ambiguous.

**[AC12]** This has been removed, thanks.

**[RC13]** Line 144: “only the latter process. . .” Should be “former”?

**[AC13]** No, this sentence is correct. The autoconversion process depends on  $N_c$  but the accretion process does not.

**[RC14]** Figure 3: the description in X-axis should be CLWP instead of LWP.

**[AC14]** We have modified the X-label and caption of Figure 3 as shown below (Figure R5).

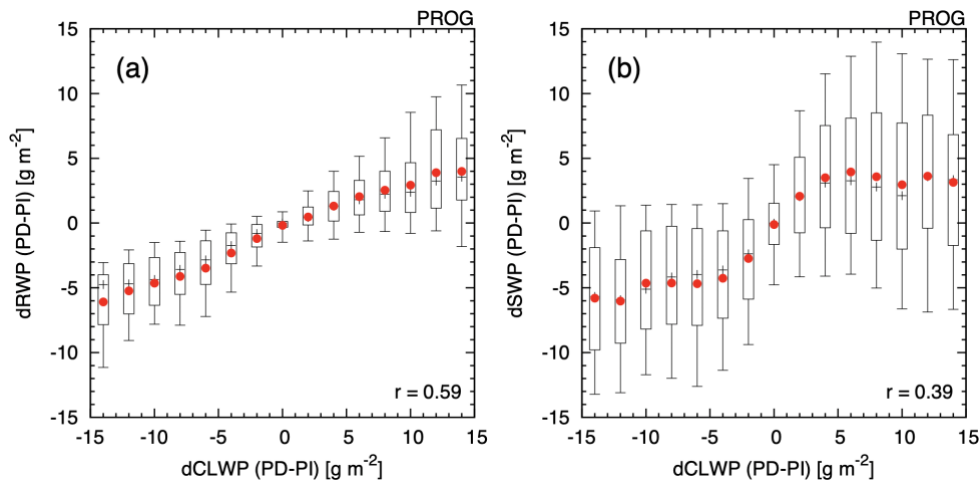

**Figure R5** (original Figure 3). Relationship between the change in annual mean CLWP and that in annual mean (a) RWP and (b) SWP, from the change in aerosols from PI to PD conditions, simulated using the PROG scheme. Box-whisker plots represent the 10th, 25th, 50th (black “+”), 75th, and 90th percentiles of the data within each bin based on the annual mean. Plots in red show the mean. The correlation coefficient ( $r$ ) is given in the figure.

**[RC15]** Line 174: “water mass suspended in the atmosphere” Does it mean cloud only?

**[AC15]** Yes, this means cloud water. We have modified this sentence.

**[RC16]** Line 175: If the total mass is the same, this argument holds. However, in this simulation, the total mass in PROG is larger than DIAG, and then the optical thickness of cloud+precipitation in PROG can be larger than that of cloud only in DIAG.

**[AC16]** Thank you for the important comment. The total mass of cloud and precipitation hydrometeors is somewhat different between the DIAG and PROG as pointed by the reviewer and our previous study (Michibata et al., 2019). However, this does not primarily determine the  $ERF_{aci}$ , and the magnitude of the  $ERF_{aci}$  is determined by the changes of cloud and precipitation hydrometeors through PI to PD. If models prognose precipitating hydrometeors as well, the PD-PI change of clouds is shared with precipitating hydrometeors which are less sensitive to SW radiation, which weakens the cooling SW effect significantly. This mechanism can therefore be robust even if the total mass is not the same between the DIAG and PROG.

## References:

- Bergeron, T. (1935). On the physics of cloud and precipitation. *Proces verbaux de l'association de meteorologie, intl. union of geod. and geophys.*, paris (pp. 156–178).
- Bellouin, N., Quaas, J., Gryspeerdt, E., Kinne, S., Stier, P., Watson-Parris, D., et al. (2020). Bounding global aerosol radiative forcing of climate change. *Reviews of Geophysics*, 58, e2019RG000660. <https://doi.org/10.1029/2019RG000660>
- Douglas, A., and L'Ecuyer, T. (2020). Quantifying cloud adjustments and the radiative forcing due to aerosol-cloud interactions in satellite observations of warm marine clouds. *Atmospheric Chemistry and Physics*, 20, 6225–6241.
- Findeisen, Z. (1938). Kolloid meteorologische vorgange bei neiderschlags-bildung. *Meteorologische Zeitschrift*, 55, 121–133
- Gottelman, A. (2015). Putting the clouds back in aerosol–cloud interactions. *Atmospheric Chemistry and Physics*, 15, 12,397–12,411. <https://doi.org/10.5194/acp-15-12397-2015>
- Ghan, S. J. (2013). Technical note: Estimating aerosol effects on cloud radiative forcing. *Atmospheric Chemistry and Physics*, 13, 9971–9974. doi:10.5194/acp-13-9971-2013
- Glassmeier, F., and U. Lohmann (2016), Constraining precipitation susceptibility of warm, ice- and mixed-phase clouds with microphysical equations, *Journal of the Atmospheric Science*, 73, 5003–5023, doi:10.1175/JAS-D-16-0008.1.
- Glassmeier, F., Hoffmann, F., Johnson, J. S., Yamaguchi, T., Carslaw, K. S., and Feingold, G. (2019). An emulator approach to stratocumulus susceptibility, *Atmos. Chem. Phys.*, 19, 10191–10203, <https://doi.org/10.5194/acp-19-10191-2019>.
- Goren, T., and Rosenfeld, D. (2014). Decomposing aerosol cloud radiative effects into cloud cover, liquid water path and Twomey components in marine stratocumulus, *Atmospheric Research*, 138, 378–393.
- Grandey B. S., et al. (2018). Effective radiative forcing in the aerosol–climate model CAM5.3-MARC-ARG, *Atmospheric Chemistry and Physics*, 18, 15783–15810
- Gryspeerdt, E., Mülmenstädt, J., Gottelman, A., Malavelle, F. F., Morrison, H., Neubauer, D., et al. (2020). Surprising similarities in model and observational aerosol radiative forcing estimates. *Atmospheric Chemistry and Physics*, 20, 613–623. <https://doi.org/10.5194/acp-20-613-2020>
- Jing, X., Suzuki, K., and Michibata, T. (2019). The key role of warm rain parameterization in determining the aerosol indirect effect in a global climate model. *Journal of Climate*, 32, 4409–4430.
- Mülmenstädt, J., et al. (2020). Reducing the aerosol forcing uncertainty using observational constraints on warm rain processes, *Science Advances*, 6, eaaz6433.
- Mülmenstädt, J., Gryspeerdt, E., Salzmann, M., Ma, P.-L., Dipu, S., and Quaas, J. (2019). Separating radiative forcing by aerosol–cloud interactions and fast cloud adjustments in the ECHAM-HAMMOZ aerosol-climate model using the method of partial radiative perturbations. *Atmospheric Chemistry and Physics*, 19, 15,415–15,429. <https://doi.org/10.5194/acp-19-15415>
- Ma, P. L., Rasch, P. J., Chepfer, H., Winker, D. M., and Ghan, S. J. (2018). Observational constraint on cloud susceptibility weakened by aerosol retrieval limitations. *Nature Communications*, 9, 2640. doi:10.1038/s41467-018-05028-4
- McCoy, D., Field, P., Gordon, H., Elsaesser, G., and Grosvenor, D. (2020). Untangling causality in midlatitude aerosol-cloud adjustments. *Atmospheric Chemistry and Physics*, 20, 4085–4103. <https://doi.org/10.5194/acp-20-4085-2020>
- Michibata, T., and Suzuki, K. (2020). Reconciling compensating errors between precipitation constraints and the energy budget in a climate model. *Geophysical Research Letters*, 47, e2020GL088340. <https://doi.org/10.1029/2020GL088340>
- Michibata, T., and Takemura, T. (2015). Evaluation of autoconversion schemes in a single model framework with satellite observations. *Journal of Geophysical Research: Atmospheres*, 120, 9570–9590.
- Wegener, A., 1911: *Thermodynamik der Atmosphäre*. J. A. Barth, 331 pp.

Thank you very much again for reviewing our paper.

Sincerely yours,

Takuro Michibata
